# Supplementary material for: Dental Caries, Tooth Loss and Quality of Life of Individuals Exposed to Social Risk Factors in Northeast Brazil
Source: MDPI journal article supplement (doi:10.3390/ijerph20176661), 2023-08-28
Supplement: s1 [file s1]

Table S1 shows the distribution of individuals according to OHIP-14 dimensions .Considering the potential impact in quality of life indicated by the association of the most negative answers (“often” and “all the time”), it could be observed that physical pain (5.8%) and psychological discomfort (5.8%) were the most frequently occurring OHIP-14 dimensions (Table 2).

**Table S1.** Distribution of individuals (n= 3063) per frequency of answers classified as “no impact” (never, hardly ever and sometimes), and “impact present” (often and all the time), according to OHIP-14 dimensions.

| OHIP-14 dimensions       | No impact |        | Impact present |       |
|--------------------------|-----------|--------|----------------|-------|
|                          | n (%)     |        | n (%)          |       |
| Functional Limitation    | 3025      | (98.8) | 38             | (1.2) |
| Physical Pain            | 2886      | (94.2) | 177            | (5.8) |
| Psychological Discomfort | 2885      | (94.2) | 178            | (5.8) |
| Physical Disability      | 2972      | (97.0) | 91             | (3.0) |
| Psychological Disability | 3000      | (97.9) | 63             | (2.1) |
| Social Disability        | 3027      | (98.8) | 36             | (1.2) |
| Handicap                 | 3028      | (98.9) | 35             | (1.1) |
